# Supplementary material for: Hearing Impairment Overview in Africa: the Case of Cameroon
Source: MDPI journal article supplement (doi:10.3390/genes11020233), 2020-02-22
Supplement: s1 [file s1]

## SUPPLEMENTARY MATERIALS

### Hearing Impairment Overview in Africa: The Case of Cameroon

Edmond Wonkam Tingang, Jean Jacques Noubiap, Jean Valentin F. Fokouo, Oluwafemi Gabriel Oluwale, Séraphin Nguefack, Emile R. Chimusa and Ambroise Wonkam

#### Content

|                                                                                                                                                                                                                                                                                                                                                                                       |   |
|---------------------------------------------------------------------------------------------------------------------------------------------------------------------------------------------------------------------------------------------------------------------------------------------------------------------------------------------------------------------------------------|---|
| <b>Table S1:</b> Search strategy in Pubmed.....                                                                                                                                                                                                                                                                                                                                       | 2 |
| <b>Table S2:</b> Search strategy in Scopus .....                                                                                                                                                                                                                                                                                                                                      | 2 |
| <b>Table S3:</b> Search strategy in AFROLIB .....                                                                                                                                                                                                                                                                                                                                     | 2 |
| <b>Table S4:</b> Search strategy in African Index Medicus .....                                                                                                                                                                                                                                                                                                                       | 2 |
| <b>Table S5:</b> Search strategy in African Journals Online.....                                                                                                                                                                                                                                                                                                                      | 3 |
| <b>Table S6:</b> Age at diagnosis of hearing impairment in Cameroon (extracted from the study by Wonkam et al. [1]) .....                                                                                                                                                                                                                                                             | 3 |
| <b>Table S7:</b> Categories of hearing loss in Cameroon with pure tone audiometry, according to the BIAP classification (extracted from the study by Wonkam et al. [1]).....                                                                                                                                                                                                          | 3 |
| <b>Figure S1:</b> Inheritance of familial hearing impairment in Cameroon. (A) Pedigree of a consanguineous family with autosomal recessive non-syndromic hearing impairment. (B) Pedigree of a family with non-syndromic hearing impairment suggestive of mitochondrial inheritance. Arrows here indicate the probands (Extracted from the study by Tingang Wonkam et al. [2]). ..... | 4 |

**Table S1:** Search strategy in Pubmed

| Search step | Search terms                                                                 | Hits   |
|-------------|------------------------------------------------------------------------------|--------|
| 1           | "Hearing impairment" OR "hearing loss" OR deaf OR deafness                   | 99 075 |
| 2           | Cameroon                                                                     |        |
| 3           | #1 and #2                                                                    | 31     |
| 4           | #3 and <b>Search limits:</b> from inception to October 31 <sup>th</sup> 2019 | 31     |

**Table S2:** Search strategy in Scopus

| Search step | Search terms                                               | Hits    |
|-------------|------------------------------------------------------------|---------|
| 1           | "Hearing impairment" OR "hearing loss" OR deaf OR deafness | 146 211 |
| 2           | Cameroon                                                   |         |
| 3           | #1 and #2                                                  | 38      |
| 4           | #3 and <b>Search limits:</b> publication year < 2020       | 38      |

**Table S3:** Search strategy in AFROLIB

| Search step | Search terms                                                                  | Hits |
|-------------|-------------------------------------------------------------------------------|------|
| 1           | "Hearing impairment" "hearing loss" "deaf" "deafness" "Cameroon"              | 15   |
| 2           | #1 and <b>Search limits:</b> publication date ≤ October 31 <sup>th</sup> 2019 | 8    |

**Table S4:** Search strategy in African Index Medicus

| Search step | Search terms                                                                  | Hits |
|-------------|-------------------------------------------------------------------------------|------|
| 1           | "Hearing impairment" "hearing loss" "deaf" "deafness" "Cameroon"              | 83   |
| 2           | #1 and <b>Search limits:</b> publication date ≤ October 31 <sup>th</sup> 2019 | 81   |

**Table S5:** Search strategy in African Journals Online

| Search step | Search terms                                                                 | Hits |
|-------------|------------------------------------------------------------------------------|------|
| 1           | “Hearing impairment” OR “hearing loss” OR deaf OR deafness                   | 268  |
| 2           | #1 and <b>Search limits:</b> from inception to October 31 <sup>th</sup> 2019 | 175  |

**Table S6:** Age at diagnosis of hearing impairment in Cameroon (extracted from the study by Wonkam et al. [1])

| Age of onset                        | Number of cases, n (%) |
|-------------------------------------|------------------------|
| Prelingual (Before 2 years old)     | 437 (75.1)             |
| Perilingual (Between 2 and 4 years) | 116 (20)               |
| Postlingual (After 4 years)         | 29 (4.9)               |

**Table S7:** Categories of hearing loss in Cameroon with pure tone audiometry, according to the BIAP classification (extracted from the study by Wonkam et al. [1]).

| Category of hearing loss  | Sensorineural hearing loss | Mixed hearing loss | Total, n (%) |
|---------------------------|----------------------------|--------------------|--------------|
| Severe I (71–80 dB)       | 14                         | 11                 | 25 (4.8)     |
| Severe II (81–90 dB)      | 39                         | 14                 | 53 (10.1)    |
| Profound I (91–100 dB)    | 140                        | 27                 | 167 (31.9)   |
| Profound II (101–110 dB)  | 156                        | 16                 | 172 (32.8)   |
| Profound III (111–120 dB) | 71                         | 11                 | 82 (15.6)    |
| Total (>120 dB)           | 25                         | 0                  | 25 (4.8)     |
| Total, n (%)              | 445 (84.9)                 | 79 (15.1)          | 524 (100)    |

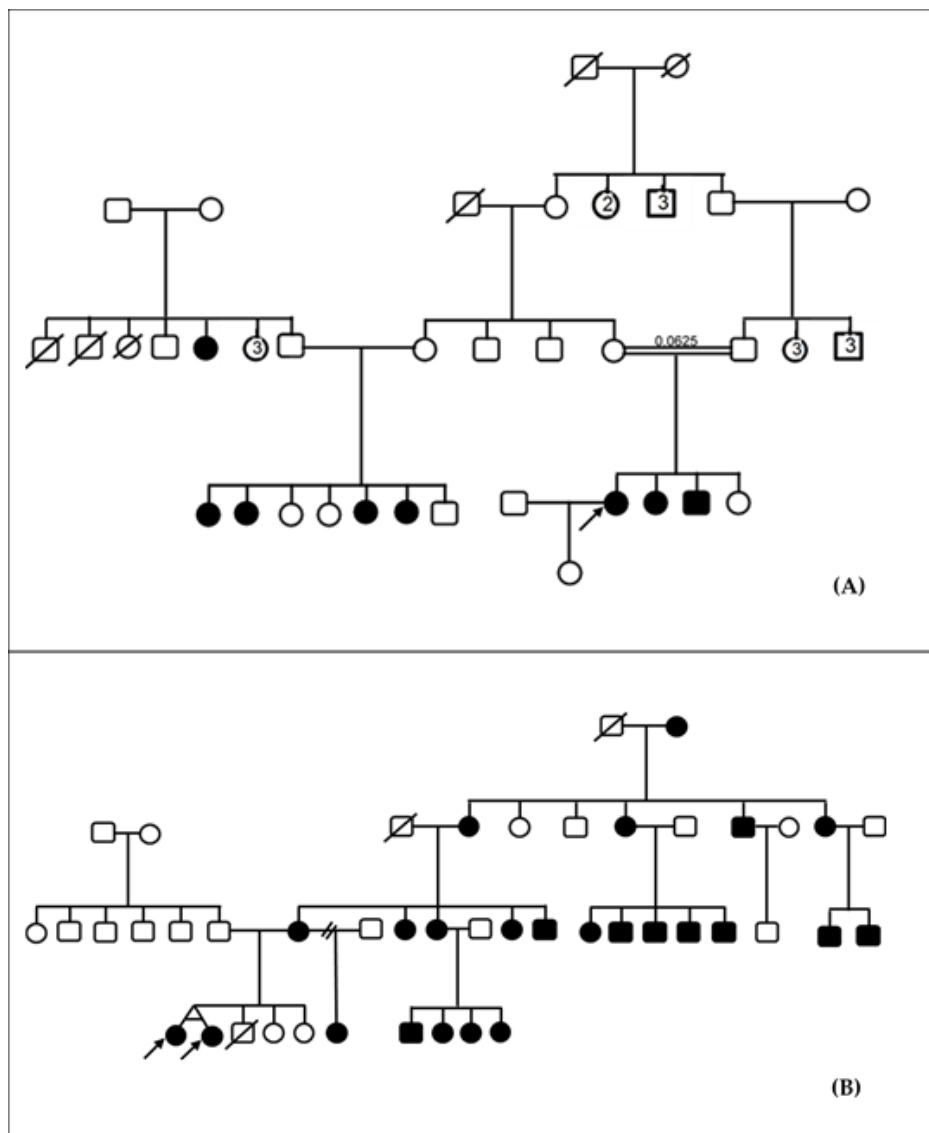

**Figure S1:** Inheritance of familial hearing impairment in Cameroon. (A) Pedigree of a consanguineous family with autosomal recessive non-syndromic hearing impairment. (B) Pedigree of a family with non-syndromic hearing impairment suggestive of mitochondrial inheritance. Arrows here indicate the probands (Extracted from the study by Tingang Wonkam et al. [2]).

## Reference:

1. Wonkam, A.; Noubiap, J.J.N.; Djomou, F.; Fieggen, K.; Njock, R.; Toure, G.B. Aetiology of childhood hearing loss in Cameroon (sub-Saharan Africa). *Eur J Med Genet* **2013**, *56*, 20–25.
2. Tingang Wonkam, E.; Chimusa, E.; Noubiap, J.J.; Adadey, S.M.; F Fokouo, J.V.; Wonkam, A. GJB2 and GJB6 Mutations in Hereditary Recessive Non-Syndromic Hearing Impairment in Cameroon. *Genes (Basel)* **2019**, *10*.
